# Supplementary material
Source: publisher figshare collection journal article supplement (https://gsapubs.figshare.com/articles/dataset/_/21397245)
Supplement: Supplementary file 1 [file 2]

## Sheet: Sheet1
Table S4. Whole-rock major element (wt.%) and trace element (ppm) compositions of representative samples from the Nyemo, Renbu, and Xigaze plutons in the Gangdese batholith.
Location	Renbu																									Nyemo																			Xigaze
Lithology	Gabbro					Mafic enclaves				Felsic rocks																Gabbro						Mafic enclave	Felsic rocks												Mafic enclaves		Felsic rocks
Sample	16TB-2*	16TB-3*	16TB-4*	16TB-5*		19TB-22	19TB-23	19TB-24	19TB-25	16TB-20*	16TB-21*	16TB-9*	19TB-23-1	19TB-22-1	19TB-24-1	16TB-10*	16TB-17*	16TB-19*	16TB-8*	16TB-11*	16TB-18*	16TB-7*	16TB-12*	19TB-25-1		1-4*	1-5*	1-6*	T323*	T321*		19TB-27	T367*	T368*	T369*	T370*	T371*	T372*	19TB-27-1	16TB-24	16TB-25	16TB-26	16TB-27		TB-16-2	19TB-17	TB-16-1	19TB-16-1	19TB-17-1
SiO2	53.73	48.04	52.52	51.46		53.026	50.906	51.366	55.124	55.81	55.57	56.93	57.62	57.251	58.387	61.05	61.3	61	63.81	64.27	65.2	65.42	65.87	65.34		53.4633	54.1994	45.95	52.05	53.8		55.998	64.7	63.64	66.89	56.38	58.76	57.39	61.465	63.53	59.3	58.7	60.19		53.83	51.679	59.59	58.649	58.78
TiO2	0.47	0.9	0.51	0.42		0.903	0.719	0.991	0.751	0.77	0.85	0.79	0.848	0.83	0.764	0.72	0.65	0.67	0.63	0.47	0.61	0.48	0.47	0.64		1.17634	1.03398	1.3	1.23	1.06		0.748	0.58	0.63	0.54	0.83	0.77	0.84	0.67	0.55	0.68	0.84	0.77		0.97	0.937	0.73	0.771	0.731
Al2O3	14.79	20.7	14.16	16.95		16.682	18.369	18.447	16.248	17.18	17.44	17.81	17.082	17.08	17.379	16.13	16.99	16.61	15.76	16.58	15.05	15.6	15.9	15.233		17.5616	18.141	17.47	15.7	17.16		16.022	16.15	16.28	15.44	17.97	16.95	17.66	16.67	16.64	17.42	16.88	16.4		16.47	18.141	16.86	16.339	16.888
Fe2O3	8.37	11.23	10.45	9.01		8.508	10.69	9.71	7.514	7.43	7.6	7.21	6.971	7.045	7.091	5.83	5.85	5.91	5.01	4.17	5.1	4.21	3.97	4.645		9.97889	9.08156	13.7227	12.663	9.82		7.637	4.64	5.08	3.94	7.72	6.79	7.32	5.473	4.52	6.05	6.85	5.55		10.43	9.211	6.19	7.604	7.166
MnO	0.18	0.23	0.21	0.17		0.156	0.249	0.155	0.187	0.11	0.12	0.11	0.115	0.108	0.116	0.1	0.1	0.09	0.08	0.07	0.09	0.07	0.07	0.069		0.170136	0.154891	0.22	0.24	0.16		0.138	0.07	0.07	0.05	0.12	0.1	0.11	0.079	0.07	0.09	0.11	0.09		0.16	0.218	0.11	0.159	0.152
MgO	7.52	4.15	7.24	7.35		6.065	4.661	3.901	4.658	4.17	4.44	3.49	3.684	4.02	3.059	3.06	2.7	3.24	2.52	2.17	2.29	2.05	1.98	1.961		3.4643	3.16348	5.3	5.45	4.26		5.099	1.92	2.21	1.63	3.58	3.18	3.29	2.683	2.22	3.12	3.26	4.13		4.47	4.517	2.56	3.372	3.027
CaO	9.09	10.41	8.8	8.13		8.559	8.445	8.416	7.063	6.82	7.23	6.3	6.845	6.899	6.382	5.23	5.29	5.36	4.38	3.95	3.55	3.77	3.66	3.691		6.9098	7.12141	11.53	7.89	7.91		7.256	3.98	4.34	3.35	6.73	5.83	6.3	5.048	4.2	5.65	5.85	4.67		8.36	9.287	4.99	6.92	6.813
Na2O	4.49	3.78	3.54	3.33		3.614	3.813	3.922	3.706	3.65	3.95	4.03	3.895	3.384	3.905	3.9	4.36	3.87	3.76	4.24	3.22	3.95	3.94	3.296		3.81187	3.86382	2.91	2.62	2.83		3.745	3.68	3.73	3.8	3.76	3.74	3.82	3.939	4.63	4.37	4.36	4.07		3.57	3.598	4.02	3.402	3.354
K2O	0.88	0.53	1.09	2.39		1.34	1.23	1.673	2.92	2.15	2.04	2.23	1.9	2.016	2.093	3.14	2.48	3.01	3.46	2.98	4.69	3.42	3.73	3.654		2.15122	2.20925	0.66	1.32	1.82		2.262	3.49	3.4	3.39	1.82	2.65	2.13	2.754	2.85	2.61	2.47	3.67		1.02	1.196	3.59	1.414	2.064
P2O5	0.26	0.14	0.27	0.15		0.253	0.17	0.257	0.182	0.23	0.27	0.22	0.261	0.244	0.239	0.18	0.19	0.19	0.18	0.14	0.16	0.13	0.12	0.139		0.551323	0.345069	0.52	0.3	0.24		0.197	0.17	0.18	0.15	0.28	0.25	0.26	0.193	0.18	0.23	0.27	0.24		0.2	0.215	0.25	0.198	0.201
LOI	0.76	0.48	0.82	1.11		0.9	0.591	0.711	0.946	1.1	1.02	1.01	0.434	1.068	0.755	0.5	0.46	0.58	0.75	1.46	0.67	1.13	0.84	0.842		1.02	1.02	1.02	0.28	0.7		0.725	0.25	0.33	0.36	0.38	0.49	0.41	0.686	0.79	0.65	0.75	0.68		0.89	0.705	0.77	0.829	0.729
SUM	100.5	100.6	99.6	100.5		100.006	99.843	99.549	99.299	99.4	100.5	100.1	99.655	99.945	100.17	99.8	100.4	100.5	100.4	100.5	100.6	100.2	100.5	99.51		100.5	100.5	100.5	99.743	99.76		99.827	99.63	99.89	99.54	99.57	99.51	99.53	99.66	100.2	100.2	100.3	100.4		100.2	99.704	99.7	99.657	99.905
Na2O/K2O	5.10227	7.13208	3.24771	1.39331		2.69701	3.1	2.34429	1.26918	1.69767	1.93627	1.80717	2.05	1.67857	1.86574	1.24204	1.75806	1.28571	1.08671	1.42282	0.686567	1.15497	1.0563	0.902025		1.77196	1.74893	4.40909	1.98485	1.55495		1.65561	1.05444	1.09706	1.12094	2.06593	1.41132	1.79343	1.43028	1.62456	1.67433	1.76518	1.10899		3.5	3.00836	1.11978	2.40594	1.625
N+K-C	-3.72	-6.1	-4.17	-2.41		-3.605	-3.402	-2.821	-0.437	-1.02	-1.24	-0.04	-1.05	-1.499	-0.384	1.81	1.55	1.52	2.84	3.27	4.36	3.6	4.01	3.259		-0.946706	-1.04834	-7.96	-3.95	-3.26		-1.249	3.19	2.79	3.84	-1.15	0.56	-0.35	1.645	3.28	1.33	0.98	3.07		-3.77	-4.493	2.62	-2.104	-1.395
MALI	-3.72	-6.1	-4.17	-2.41		-3.605	-3.402	-2.821	-0.437	-1.02	-1.24	-0.04	-1.05	-1.499	-0.384	1.81	1.55	1.52	2.84	3.27	4.36	3.6	4.01	3.259		-0.946706	-1.04834	-7.96	-3.95	-3.26		-1.249	3.19	2.79	3.84	-1.15	0.56	-0.35	1.645	3.28	1.33	0.98	3.07		-3.77	-4.493	2.62	-2.104	-1.395
A/NK	1.77303	3.04689	2.02094	2.09991		2.25443	2.41453	2.23121	1.75361	2.06049	2.00184	1.968	2.01686	2.20251	1.99862	1.642	1.72243	1.72429	1.58547	1.62404	1.44899	1.528	1.51006	1.6227		2.04075	2.07234	3.17429	2.73392	2.58796		1.85964	1.64106	1.65686	1.55486	2.20202	1.8774	2.05449	1.76054	1.55374	1.73827	1.71316	1.53585		2.35959	2.51362	1.60433	2.29121	2.17698
A/CNK	0.594013	0.803731	0.614711	0.740821		0.725643	0.799012	0.781757	0.734199	0.827555	0.797041	0.867731	0.815865	0.840517	0.855272	0.833616	0.871312	0.856371	0.879556	0.952669	0.893035	0.91355	0.924644	0.945543		0.82872	0.835028	0.659129	0.780561	0.815659		0.733879	0.944969	0.918176	0.963079	0.880066	0.862711	0.879886	0.893199	0.906335	0.857598	0.823074	0.854869		0.741652	0.751719	0.860291	0.8279	0.837411
Li	2.84	3.54	6.62	11.2		12.661	11.5426	18.9956	8.41272	13.7	20	17.2	16.1347	17.675	17.2741	14.1	17.5	16.4	16.4	19.3	13	18.5	21.9	15.196								12.5299							14.9507	15.6324	17.5608	13.6848	24.6123		16.1854	7.28699	12.029	10.3883	8.78602
Be	0.83	0.77	0.45	0.52		1.08506	0.981176	1.32387	1.3751	1.04	1.06	1.09	1.13183	0.967256	1.30683	1.38	1.35	1.13	1.1	1.24	0.85	1.16	1.25	1.44163					0.98	1.18		1.38684	1.27	1.29	1.34	1.04	1.23	1.23	1.72385	1.4311	1.29622	1.41172	1.80072		0.830744	1.01581	1.08605	1.07662	0.870943
Sc	39.4	27.3	41.5	39.6		23.2594	25.3216	20.3959	23.3537	16.7	17.6	16.2	15.9223	16.041	16.6005	15.1	12.2	13.1	10.6	8.2	15.2	9.59	8.06	8.7645					31.6	26.5		21.0384	9.48	11.1	8.15	17.6	15.3	14.2	11.0205	9.26475	13.0072	14.7618	11.7364		34.8148	26.3676	13.3347	16.9832	16.1702
V	323	353	315	284		210.171	279.701	281.472	189.572	198	189	172	165.063	177.541	168.631	136	135	140	124	86.1	111	94.8	81.7	103.658					327	254		186.25	110	122	94.7	199	166	181	129.258	101.04	145.422	161.759	125.856		304.895	266.008	126.707	195.525	166.734
Cr	278	2.67	90.3	113		206.929	1.39029	3.59656	123.262	48.5	63.8	19.5	49.8074	67.5111	21.2459	34.4	14.1	48.7	28.6	16.5	17.3	19.5	15.5	21.3395		8.32788	8.03587	23.8	10.8	23.7		187.545	21.4	29.4	19.3	46.2	33.1	36.5	35.5507	29.4617	42.8197	28.7708	36.0367		41.5335	8.13712	70.9951	2.67201	3.05665
Co	30.2	32.9	28.8	31		30.9189	28.9183	24.6474	22.9924	24.5	24.6	20	20.5942	22.838	17.9634	17	15.5	18	14.2	11.1	12.5	11	10.5	11.7993					36.2	29.3		25.1699	89.7	95.7	116	57.6	85.8	80.9	15.9277	12.4775	17.9893	19.6506	14.8687		29.9453	24.8758	18.5899	19.1291	16.3779
Ni	76.2	9.2	25	49.1		65.8962	5.38474	14.34	34.1544	32.6	38.6	14.8	28.9127	39.3394	12.137	18.4	12.3	26.6	15.7	10.1	7.84	10.2	9.39	11.8891		12.2192	12.2372	16.7	17.4	20.4		40.9971	13.8	16.5	12.3	26.4	20.7	26.2	20.4268	17.1658	23.5	19.7246	19.4478		12.0975	14.9478	19.646	7.68881	6.76777
Cu	37.7	106	469	101		218.023	121.5	242.276	22.1393	117	55.5	72.8	70.9002	96.6695	72.2255	72.4	58.9	66	42	28	66.8	22.9	25.2	46.8751					87.8	122		8.89553	64.3	106	19.4	24.3	73.3	21.4	81.1526	10.789	73.9104	61.4	75.7348		200.841	88.5291	110.042	34.9091	57.0912
Zn	73.6	99	101	122		89.7475	91.2041	98.2281	87.88	76.8	80.4	77.8	72.9275	74.1924	77.2145	68.7	69.5	68.3	57.1	54	48.2	53.5	48.8	54.7861					125	96		86.2756	60	59.6	49	77.9	72.2	79	60.3187	56.9889	70.1791	77.6884	67.4732		91.2808	83.0433	94.3311	68.3606	63.8118
Ga	13.2	20.2	14.5	15.2		19.1166	19.952	21.5924	18.3413	18.8	19.2	19.6	19.0669	19.6291	19.4949	18	18.1	18.1	17	17.4	14.4	17.1	16.6	16.6401					18.7	19.2		18.8995	18.3	18.7	18.8	20.5	19.6	20.6	18.9958	19.3099	19.9658	19.5616	18.8118		30.3638	19.3328	35.0116	17.8298	17.5885
Rb	7.43	2.8	16	41.4		36.6654	24.1529	70.3494	83.36	54.8	49.9	56.2	58.2636	60.6862	52.9983	80.6	65.3	68.1	113	67.1	82.4	91.3	113	116.183		44.1016	44.4629	8.22	19.4	48.3		90.4359	136	127	116	49.6	94.3	97.3	104.704	97.5372	86.1478	88.7884	141.15		19.1059	30.3829	95.0587	32.0244	43.6144
Sr	448	563	857	440		820.623	565.517	799.841	438.32	725	801	636	780.239	763.977	633.678	520	573	634	510	573	329	480	454	399.841		467.196	535.412	758	502	519		661.382	528	569	503	713	602	641	634.565	562.872	683.486	616.784	508.116		510.339	513.179	515.763	386.945	408.796
Y	14.8	17.6	14.6	12.2		14.8767	19.082	15.3247	24.398	13.2	14.3	20	13.6513	12.6142	18.1557	27.5	13.7	14.1	11.9	12.6	28	15.3	11.9	15.8657		36.7246	28.1982	29.1	27.2	26.2		14.702	12.2	12.4	10.7	13.6	16.1	14.9	11.7337	11.4793	12.1462	16.4497	17.5524		22.9673	21.4518	17.3871	23.2946	22.7559
Zr	36.1	45.1	32	36		61.9759	58.3562	29.7011	106.513	77.7	62.5	51.8	121.067	106.407	139.145	128	107	104	160	138	171	142	131	200.722		204.615	75.5654	50.2	38.2	79		97.7255	96.5	103	103	54.2	92.3	47.9	196.455	112.414	114.927	151.297	171.975		104.671	86.3448	330.011	153.456	176.671
Nb	0.88	1.48	0.63	0.73		3.50564	2.94642	3.8299	5.95006	3.99	4.2	5.38	4.27093	4.15118	4.48801	7.07	3.84	4.79	5.57	3.69	5.62	5.49	4.21	6.1053		8.72909	6.90632	2.73	5.41	5.85		4.93349	7.01	7.24	7.44	5.89	7.94	7.18	6.43717	6.97179	6.04202	9.06307	10.9525		3.51233	6.1582	8.40096	9.65976	8.25747
Sn	0.53	0.57	0.87	0.41		0.731479	0.852774	1.26833	1.49814	0.77	0.85	1.05	0.804087	0.827565	0.978192	1.68	0.92	0.82	0.78	0.7	1.17	0.99	0.81	1.08359					1.13	1.59		0.780781	1.31	1.23	1.05	1.04	1.38	1.22	1.0479	1.00119	0.882356	1.14318	1.55518		0.956851	0.704909	0.98664	0.923528	0.966447
Cs	0.2	0.24	0.42	1.12		2.13126	0.998838	2.9116	1.44277	3.08	3.58	2.22	2.75947	4.43636	2.78829	3.15	2.88	2.97	3.94	1.5	2.16	2.24	6.01	4.56231					1.54	4.31		3.49408	8.45	8.01	5.74	4.77	7.55	6.29	6.14134	4.90065	5.34053	5.75044	11.655		1.52983	0.473595	2.51529	1.12202	1.10437
Ba	129	92.5	110	237		231.734	268.951	112.295	424.861	365	386	369	361.791	375.81	384.106	412	447	498	553	466	919	527	470	414.791		322.473	379.817	140	290	262		419.96	596	638	537	458	478	430	531.478	502.059	547.995	583.94	537.857		384.853	217.585	982.485	368.565	407.59
La	11.1	6.47	8.5	6.45		15.5135	13.5026	16.1472	17.9788	15.5	16.2	16.2	15.9687	16.13	18.2703	20.9	15.9	18.3	13.6	13.8	19.6	20.1	15	19.3065		25.8981	20.3704	14.1	15.3	16.8		16.5756	20.2	20	21.3	18.3	21.3	19.6	19.5058	20.1409	17.5125	21.3742	24.5805		11.4893	12.7084	22.9751	18.1618	16.286
Ce	25.5	14.7	19.8	14.8		32.9304	30.5014	34.2187	41.09	30.8	32.4	34.7	33.4577	33.9971	40.371	49.3	29.7	37	26.8	25.9	41.6	38.8	28.9	39.3991		56.1323	42.3749	36	35.6	39		34.9744	42.5	45.1	47.1	39.2	47.8	43.1	40.0844	37.5089	34.8842	43.8079	49.5272		26.5573	27.4056	44.9053	40.9689	35.2728
Pr	3.39	2.08	2.75	1.95		4.02773	3.65837	4.29779	5.35497	3.72	3.96	4.56	4.1092	3.98106	5.0708	6.17	3.4	4.42	3.31	3.17	5.24	4.41	3.37	4.48368		7.26501	5.28783	5.55	4.89	5.25		4.39586	5.1	5.24	5.08	4.93	5.63	5.15	4.56519	4.3468	4.19239	5.26249	5.8612		3.52025	3.49146	5.37356	4.91841	4.45561
Nd	16.9	10.4	13.7	9.53		17.759	15.2156	18.3757	23.2145	15.8	17.5	20.7	17.1829	16.6003	20.7063	27.8	14.7	18.6	14.7	13.5	23.5	18.1	13.8	18.6304		33.4397	23.4243	26.9	21.4	22.3		18.341	19.1	19.8	18.2	19.7	22.2	20	17.9198	17.1695	17.2788	21.9051	24.3703		15.7367	15.6097	21.819	19.2736	18.6115
Sm	4.24	2.85	3.39	2.48		3.76886	3.59653	3.68987	5.3065	3.22	3.69	4.49	3.76469	3.44285	4.45859	6.05	3.03	3.71	3	2.6	5.26	3.44	2.83	3.90089		7.6558	5.4765	7.14	5.12	5.25		3.84474	3.7	3.9	3.27	3.95	4.43	4.14	3.37048	3.28332	3.39624	4.39899	4.61499		3.76126	3.63871	4.18224	3.85537	4.00266
Eu	1.25	0.99	0.94	0.77		1.14452	1.20852	1.16385	0.933191	0.97	1.14	1.11	0.984622	0.917969	1.15656	1.14	0.84	0.99	0.82	0.62	1.08	0.81	0.67	0.663659		1.56625	1.62762	1.9	1.27	1.28		1.04412	0.86	0.9	0.76	1.17	1.16	1.2	0.912905	0.851059	0.98514	1.10116	1.06583		1.21746	1.20124	1.20987	1.07415	1.12024
Gd	3.71	2.88	2.91	2.25		3.3943	3.291	3.20721	4.3558	2.81	3.17	4.15	2.85496	2.87526	3.84566	5.22	2.62	3.07	2.59	2.13	4.9	2.93	2.25	3.2042		7.54406	5.26581	6.68	4.82	4.72		3.37284	2.74	2.88	2.47	3.09	3.45	3.29	2.80923	2.67011	2.83531	3.62756	3.85344		3.94823	3.81598	4.00329	3.77461	3.90654
Tb	0.51	0.47	0.42	0.36		0.518382	0.534075	0.540012	0.769237	0.41	0.46	0.63	0.457142	0.426668	0.589137	0.83	0.41	0.45	0.37	0.34	0.77	0.44	0.34	0.467031		1.07731	0.804538	0.96	0.77	0.76		0.518712	0.39	0.42	0.35	0.45	0.5	0.48	0.422592	0.376734	0.408208	0.536718	0.544207		0.595412	0.677196	0.593107	0.604134	0.619747
Dy	2.76	2.92	2.53	2.02		2.83499	3.17561	2.91104	4.48266	2.32	2.66	3.68	2.63063	2.28593	3.37805	4.85	2.39	2.55	2.12	1.94	4.75	2.54	1.99	2.76138		6.24184	4.86583	5.87	4.73	4.59		2.69601	2.19	2.24	1.85	2.47	2.77	2.73	2.23723	2.08641	2.2995	3.09762	3.11824		3.91003	3.91504	3.26542	3.92644	3.91829
Ho	0.53	0.63	0.53	0.43		0.559326	0.642999	0.566864	0.847869	0.46	0.52	0.72	0.490292	0.457018	0.652641	0.95	0.49	0.5	0.41	0.39	0.94	0.51	0.4	0.546647		1.23714	0.947114	1.2	0.99	0.96		0.519417	0.41	0.43	0.35	0.47	0.52	0.52	0.427872	0.39937	0.425142	0.577104	0.603718		0.863678	0.789157	0.629128	0.774897	0.76518
Er	1.41	1.8	1.5	1.21		1.50596	1.94338	1.53295	2.46449	1.29	1.38	1.91	1.34949	1.20999	1.79441	2.63	1.37	1.34	1.1	1.25	2.78	1.45	1.13	1.54008		3.36714	2.53511	3.39	2.77	2.68		1.47708	1.1	1.17	0.99	1.28	1.41	1.46	1.1878	1.11763	1.14111	1.57052	1.66534		2.3757	2.19398	1.86095	2.2941	2.33421
Tm	0.2	0.27	0.22	0.18		0.220959	0.315585	0.222181	0.373467	0.18	0.2	0.26	0.202388	0.188888	0.2713	0.39	0.2	0.19	0.17	0.2	0.41	0.22	0.17	0.23647		0.464534	0.378117	0.47	0.43	0.41		0.206005	0.19	0.19	0.15	0.19	0.22	0.2	0.166633	0.167395	0.165227	0.226202	0.239424		0.347028	0.319205	0.280788	0.371396	0.352471
Yb	1.3	1.8	1.47	1.23		1.35399	2.14197	1.36442	2.42064	1.18	1.31	1.72	1.20104	1.19053	1.66612	2.5	1.31	1.26	1.04	1.12	2.84	1.51	1.13	1.55306		3.36511	2.80972	2.9	2.86	2.61		1.35687	1.04	1.13	0.94	1.15	1.34	1.29	1.07765	1.0817	1.15247	1.5572	1.71302		2.29198	2.23969	1.90921	2.75161	2.4286
Lu	0.2	0.27	0.23	0.2		0.204491	0.370358	0.223152	0.386909	0.19	0.19	0.25	0.190962	0.181707	0.265581	0.37	0.19	0.19	0.16	0.16	0.41	0.21	0.18	0.240059		0.455769	0.375583	0.41	0.45	0.42		0.209222	0.16	0.18	0.16	0.19	0.23	0.21	0.175447	0.160401	0.15839	0.228742	0.252952		0.347358	0.341771	0.315948	0.399515	0.371147
Hf	1.09	1.42	1.08	1.07		1.80563	2.00001	0.990973	2.76822	2.31	1.93	1.61	3.20559	2.93565	3.70921	3.79	3.19	3.09	4.29	3.75	4.82	3.92	3.66	5.39428		4.67037	2.03549	1.79	1.32	2.64		2.60951	2.96	3.01	3.2	1.56	2.72	1.58	5.04085	3.40533	3.26026	4.28803	4.82321		2.63202	2.35598	8.71216	4.30226	4.71483
Ta	0.044	0.087	0.037	0.038		0.212436	0.284601	0.237236	0.3183	0.29	0.3	0.37	0.277328	0.323105	0.301402	0.47	0.26	0.4	0.3	0.23	0.33	0.45	0.29	0.425838		0.504122	0.430361	0.2	0.33	0.39		0.329488	0.66	0.64	0.96	0.44	0.65	0.53	0.551931	0.561671	0.432316	0.656435	0.766211		0.262513	0.331002	0.620161	0.67529	0.601258
Pb	7.74	8.08	6.97	5.84		9.56848	6.29337	12.4409	10.5062	10.8	10	9.28	10.1075	11.5101	10.5902	13.5	12.3	12.7	15.5	13.8	12.2	13	13.3	14.0738		11.3593	12.3052	4.83	17.1	15.5		9.29798	15.1	13.5	11.5	7.74	9.48	12.6	10.1448	10.6178	10.2844	8.92794	13.5017		24.6054	4.54029	11.6612	3.78372	5.20276
Th	0.92	0.94	1.24	0.98		1.34898	2.18704	2.42955	2.67328	5.78	4.43	3.87	4.09689	6.34704	5.87182	42.2	5.24	9.87	3.05	5.39	4.96	8.47	7.74	14.3176		3.47139	4.52339	0.59	1.28	5.24		4.45677	14	12.6	7.13	7.58	11.4	9.8	10.6704	14.7445	7.83816	11.2132	16.4123		1.95812	0.958196	5.22703	3.26627	5.02257
U	0.32	0.27	0.52	0.34		0.481349	0.839681	0.664156	0.800862	2.49	1.22	1.09	0.789789	2.01033	1.49796	3.53	0.95	2.17	0.88	1.76	1.33	2.11	2.46	2.94412		1.1598	1.38236	0.21	0.39	1.57		1.0304	2.61	2.05	2.45	1.58	3.43	2.55	3.25031	3.45856	1.71304	2.86237	3.82003		0.545898	0.335156	1.61587	1.0009	1.34149
Sr/Y	30.2703	31.9886	58.6986	36.0656		55.1617	29.6361	52.1929	17.9654	54.9242	56.014	31.8	57.1548	60.5649	34.9025	18.9091	41.8248	44.9645	42.8571	45.4762	11.75	31.3725	38.1513	25.2016		12.7216	18.9874	26.0481	18.4559	19.8092		44.9859	43.2787	45.8871	47.0093	52.4265	37.3913	43.0201	54.0805	49.0335	56.2718	37.4953	28.9485		22.2202	23.9224	29.6636	16.6109	17.9644
YbN	6.2201	8.61244	7.03349	5.88517		6.47841	10.2487	6.52831	11.582	5.64593	6.26794	8.22967	5.74659	5.69632	7.97185	11.9617	6.26794	6.02871	4.97608	5.35885	13.5885	7.22488	5.4067	7.43092		16.101	13.4436	13.8756	13.6842	12.488		6.4922	4.97608	5.4067	4.49761	5.50239	6.41148	6.17225	5.15624	5.17558	5.51421	7.45072	8.19625		10.9664	10.7162	9.13499	13.1656	11.6201
(La/Yb)N	5.75658	2.42335	3.8984	3.53541		7.72467	4.24999	7.97875	5.00742	8.85593	8.33736	6.34996	8.96389	9.13437	7.39306	5.63626	8.18296	9.79186	8.81638	8.30703	4.65289	8.97436	8.94947	8.38106		5.18863	4.88788	3.27798	3.6067	4.33964		8.23597	13.0949	11.9326	15.2769	10.7285	10.7167	10.2436	12.2031	12.5533	10.2448	9.25401	9.67417		3.37962	3.82552	8.11312	4.44996	4.52109
(Dy/Yb)N	1.37802	1.05293	1.1171	1.06595		1.35902	0.962283	1.38481	1.20198	1.27613	1.31796	1.3887	1.42165	1.24627	1.31598	1.25919	1.18418	1.31359	1.3231	1.12428	1.08559	1.09181	1.14305	1.15406		1.20394	1.12405	1.3138	1.07346	1.14146		1.28965	1.36679	1.28665	1.27742	1.39409	1.34173	1.37361	1.34748	1.25194	1.29507	1.29114	1.18151		1.10729	1.13459	1.11013	0.926194	1.0472
Th/Yb	0.707692	0.522222	0.843537	0.796748		0.996298	1.02104	1.78065	1.10437	4.89831	3.38168	2.25	3.41112	5.33126	3.52425	16.88	4	7.83333	2.93269	4.8125	1.74648	5.60927	6.84956	9.21892		1.03158	1.60991	0.203448	0.447552	2.00766		3.2846	13.4615	11.1504	7.58511	6.5913	8.50746	7.5969	9.9015	13.6309	6.80118	7.20089	9.58095		0.854336	0.427826	2.73779	1.18704	2.06809
Nb/Yb	0.676923	0.822222	0.428571	0.593496		2.58912	1.37556	2.80699	2.45805	3.38136	3.20611	3.12791	3.55603	3.48683	2.6937	2.828	2.9313	3.80159	5.35577	3.29464	1.97887	3.63576	3.72566	3.93113		2.594	2.45801	0.941379	1.89161	2.24138		3.63594	6.74038	6.40708	7.91489	5.12174	5.92537	5.56589	5.97332	6.44524	5.24267	5.8201	6.39369		1.53244	2.74958	4.40022	3.51058	3.4001
Ba/La	11.6216	14.2968	12.9412	36.7442		14.9376	19.9185	6.95448	23.6313	23.5484	23.8272	22.7778	22.6563	23.2988	21.0236	19.7129	28.1132	27.2131	40.6618	33.7681	46.8878	26.2189	31.3333	21.4845		12.4516	18.6456	9.92908	18.9542	15.5952		25.336	29.505	31.9	25.2113	25.0273	22.4413	21.9388	27.2472	24.9274	31.2917	27.3199	21.8814		33.4966	17.1213	42.7631	20.2934	25.027
Ga/Yb	2.85385	1.6	1.97959	1.82927		2.50689	1.53644	2.35061	1.79944	2.38136	2.41985	2.41279	2.37708	2.4151	2.30816	2.088	2	2.43651	2.49038	1.90179	1.72535	1.9404	1.99115	2.06315		2.24185	1.87414	2.30345	1.68531	1.80843		2.48575	2.63462	2.54867	2.62766	2.68696	2.57463	2.55039	2.6068	2.46845	2.4602	2.32954	2.24951		1.72263	1.7038	2.09683	1.37178	1.60856
Dy/Yb	2.12308	1.62222	1.72109	1.64228		2.09381	1.48256	2.13354	1.85185	1.9661	2.03053	2.13953	2.1903	1.9201	2.0275	1.94	1.82443	2.02381	2.03846	1.73214	1.67254	1.68212	1.76106	1.77802		1.85487	1.73178	2.02414	1.65385	1.75862		1.98693	2.10577	1.9823	1.96809	2.14783	2.06716	2.11628	2.07602	1.92883	1.99528	1.98923	1.82032		1.70596	1.74803	1.71035	1.42696	1.61339
Nb/U	2.75	5.48148	1.21154	2.14706		7.28296	3.50897	5.76657	7.42956	1.60241	3.44262	4.93578	5.40769	2.06493	2.99608	2.00283	4.04211	2.20737	6.32955	2.09659	4.22556	2.6019	1.71138	2.07373		7.52638	4.99604	13	13.8718	3.72611		4.78794	2.68582	3.53171	3.03673	3.72785	2.31487	2.81569	1.98048	2.01581	3.52707	3.16628	2.86712		6.43405	18.3742	5.19902	9.65111	6.15543
Ce/Pb	3.29457	1.81931	2.84075	2.53425		3.44155	4.84658	2.75051	3.91101	2.85185	3.24	3.73922	3.31017	2.95367	3.81211	3.65185	2.41463	2.91339	1.72903	1.87681	3.40984	2.98462	2.17293	2.79947		4.94154	3.44366	7.45342	2.08187	2.51613		3.7615	2.81457	3.34074	4.09565	5.0646	5.04219	3.42063	3.95121	3.53265	3.39197	4.90683	3.66821		1.07933	6.03608	3.85083	10.8277	6.77964
Nb/La	0.0792793	0.228748	0.0741176	0.113178		0.225974	0.218211	0.237187	0.330949	0.257419	0.259259	0.332099	0.267457	0.257358	0.245646	0.338278	0.241509	0.261749	0.409559	0.267391	0.286735	0.273134	0.280667	0.31623		0.337056	0.339038	0.193617	0.353595	0.348214		0.297636	0.34703	0.362	0.349296	0.321858	0.37277	0.366327	0.330013	0.346151	0.345012	0.424019	0.445577		0.305704	0.484575	0.365655	0.531873	0.507029
La/Yb	8.53846	3.59444	5.78231	5.2439		11.4576	6.30381	11.8345	7.42727	13.1356	12.3664	9.4186	13.2957	13.5486	10.9658	8.36	12.1374	14.5238	13.0769	12.3214	6.90141	13.3113	13.2743	12.4312		7.69606	7.24996	4.86207	5.34965	6.43678		12.216	19.4231	17.6991	22.6596	15.913	15.8955	15.1938	18.1002	18.6197	15.1956	13.726	14.3493		5.01283	5.67421	12.0338	6.60042	6.70592
"*" data was cited from Wang R.Q et al., 2020 Mineralogy and Petrology, Xu W.C et al., 2015 Lithos, and Dong X et al., 2018.
Dong, X., Zhang, Z. M., Klemd, R., He, Z. Y., & Tian, Z. L. (2018). Late Cretaceous tectonothermal evolution of the southern Lhasa terrane, South Tibet: Consequence of a Mesozoic Andean-type orogeny. Tectonophysics, 730, 100-113.
Wang, R. Q., Qiu, J. S., Wen, D. J., & Xu, H. (2021). The role of hydrous mantle-derived magmas in the generation of Late Cretaceous granitoids in the Gangdese batholith: insights from the Shanba and Zongga plutons in the southern Lhasa subterrane, Tibet. Mineralogy and Petrology, 115(1), 113-136.
Xu, W. C., Zhang, H. F., Luo, B. J., Guo, L., & Yang, H. (2015). Adakite-like geochemical signature produced by amphibole-dominated fractionation of arc magmas: An example from the Late Cretaceous magmatism in Gangdese belt, south Tibet. Lithos, 232, 197-210.
[truncated: 1 more columns]
